# Supplementary material for: A Small Molecule (Pluripotin) as a Tool for Studying Cancer Stem Cell Biology: Proof of Concept
Source: PubMed Central journal article supplement (PMC3578829; doi:10.1371/journal.pone.0057099), 2013-02-21

A

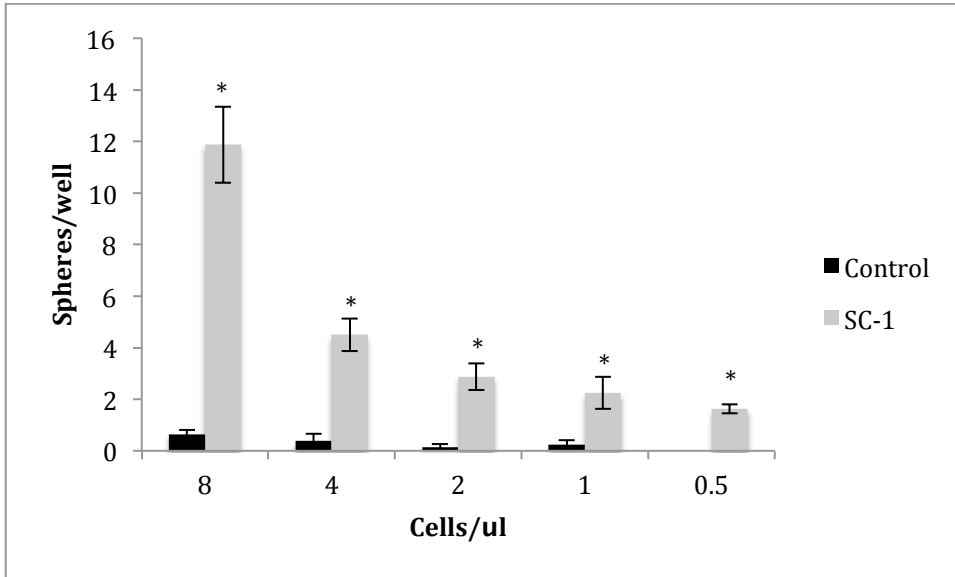

B

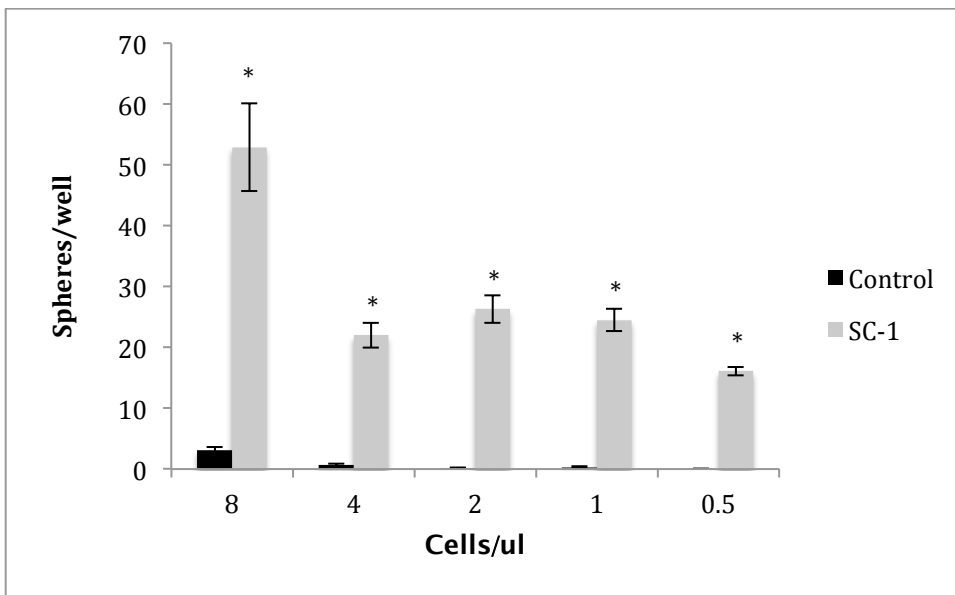

Supplement: pone.0057099.s005.pdf [file pone.0057099.s005.pdf]
